# Supplementary material for: Swallowability of Minitablets among Children Aged 6–23 Months: An Exploratory, Randomized Crossover Study
Source: MDPI journal article supplement (doi:10.3390/pharmaceutics14010198), 2022-01-15
Supplement: s1 [file s1]

# Supplementary Materials: Swallowability of Minitablets among Children Aged 6–23 Months: An Exploratory, Randomized Crossover Study

Nao Mitsui, Noriko Hida, Taro Kamiya, Taigi Yamazaki, Kazuki Miyazaki, Kiyomi Saito, Jumpei Saito, Akimasa Yamatani, Yoichi Ishikawa, Hidefumi Nakamura, Akihiro Nakamura and Tsutomu Harada

**Table S1.** Observation results of the administration of formulations and the number of subjects who did not meet the evaluation criteria.

| Observation results of taking the formulations<br>[How to take them]                                                                                                                                      | No. of subjects |
|-----------------------------------------------------------------------------------------------------------------------------------------------------------------------------------------------------------|-----------------|
| <b>Minitablets for children aged 6–11 months</b>                                                                                                                                                          |                 |
| The subject was able to swallow up to 3 minitables without chewing but spat out the remaining tablet.<br>[Subject repeatedly taking one minitable at a time.]                                             | 1               |
| The subject was able to swallow up to 2 tablets without chewing but then refused to take them; two tablets remained.<br>[Subject repeatedly taking one minitable at a time.]                              | 2               |
| The subject put the tablets in the mouth, but the tablets got caught between gums and lips; the subject then refused to take all the tablets.<br>[Subject trying to take more than one tablet at a time.] | 1               |
| <b>Minitablets for children aged 12–23 months</b>                                                                                                                                                         |                 |
| The subject was able to swallow up to 4 minitables by chewing, but then he spat out the remaining tablet.<br>[Subject repeatedly taking one minitable at a time.]                                         | 1               |
| The subject was able to swallow up to 3 minitables without chewing, but then he spat out one tablet and dropped the other.<br>[Subject repeatedly taking one minitable at a time.]                        | 1               |
| The subject was able to swallow up to 2 tablets without chewing but then refused to take them, and three tablets remained.<br>[Subject repeatedly taking one minitable at a time.]                        | 1               |
| The subject was able to swallow up to 1 tablet without chewing but then refused to take them, and four tablets remained.<br>[Subjects repeatedly taking one minitable at a time.]                         | 2               |
| <b>Fine granules for children aged 6–11 months</b>                                                                                                                                                        |                 |
| The subject put dispersed fine granules into the mouth but spat them out immediately.<br>[Caregivers added water to the fine granules and administered them.]                                             | 1               |
| The subject swallowed some of the dispersed fine granules but refused to take them.<br>[Caregivers added water to the fine granules and administered them.]                                               | 2               |
| The subject swallowed half of the dispersed fine granules but spat out the other half.<br>[Caregivers added water to the fine granules and administered them.]                                            | 1               |
| The subject put fine granules in the mouth but then spat out them. (Criteria 3)<br>[Caregivers administered fine granules in powder form.]                                                                | 1               |
| The subject refused to put the fine granules in the mouth. (Criteria 5)<br>[Caregivers administered fine granules in powder form.]                                                                        | 1               |
| <b>Fine granules for children aged 12–23 months</b>                                                                                                                                                       |                 |
| The subject swallowed half of the dispersed fine granules, but then spat out the other half.<br>[Caregivers added water to the fine granules and administered them.]                                      | 2               |

---

|                                                                                                                                                                              |   |
|------------------------------------------------------------------------------------------------------------------------------------------------------------------------------|---|
| The subject swallowed some of the dispersed fine granules but refused to take them.<br>[Caregivers added water to the fine granules and administered them.]                  | 3 |
| The subject swallowed half of the dispersed fine granules, but dispersed powder and liquid remained.<br>[Caregivers added water to the fine granules and administered them.] | 2 |
| The subject swallowed some fine granules trickling a part out of the mouth. (Criteria 2)<br>[Caregivers administered fine granules in powder form.]                          | 1 |
| <b>Liquid formulations for children aged 6–11 months</b>                                                                                                                     |   |
| The subject swallowed half of liquid formulations, but then spat out the other half.                                                                                         | 1 |
| The subject swallowed some of liquid formulations, but then refused to take them.                                                                                            | 2 |
| The subject swallowed part of liquid formulation, but a little remained in the dropper.                                                                                      | 1 |

---
